# Supplementary material for: Batch and continuous flow asymmetric synthesis of anabolic-androgenic steroids via a single-cell biocatalytic Δ1-dehydrogenation and C17β-carbonyl reduction cascade
Source: Royal Society of Chemistry journal article supplement (doi:10.1039/d2gc04894a), 2023-01-01
Supplement: d2gc04894a1.pdf [file d2gc04894a1.pdf]

## Supplementary information

# Batch and continuous flow asymmetric synthesis of anabolic-androgenic steroids via single-cell biocatalytic $\Delta^1$ -dehydrogenation and C17 $\beta$ -carbonyl reduction cascade

Yajiao Zhang,<sup>a</sup> Minjie Liu,<sup>a</sup> Zixin Yang,<sup>b</sup> Juan Lin,<sup>\*a</sup> Zedu Huang<sup>\*c, d</sup> and Fener Chen<sup>\*a, b, c, d</sup>

a. College of Chemical Engineering, Fuzhou University, Fuzhou 350102, China.

b. Institute of Pharmaceutical Science and Technology, College of Chemistry, Fuzhou University, Fuzhou 350108, China.

c. Engineering Center of Catalysis and Synthesis for Chiral Molecules, Department of Chemistry, Fudan University, Shanghai 200433, China.

d. Shanghai Engineering Center of Industrial Asymmetric Catalysis for Chiral Drugs, China.

**\* Corresponding author:** Prof. Fener Chen (Email: rfchen@fudan.edu.cn), Prof. Zedu Huang (Email: huangzedu@fudan.edu.cn), and Prof. Juan Lin (Email: ljuan@fzu.edu.cn).

## Content

|                                                                                                                                                                             |    |
|-----------------------------------------------------------------------------------------------------------------------------------------------------------------------------|----|
| Scheme S1. Chemical approaches for the synthesis of (+)-boldenone. ....                                                                                                     | 3  |
| Scheme S2 The stepwise biotransformations from PS to BD .....                                                                                                               | 4  |
| Tab. S1 Primers for mutagenesis of ReKstD .....                                                                                                                             | 5  |
| Tab. S2 Construction of each <i>E. coli</i> cells based on different plasmid compositions. ....                                                                             | 7  |
| Tab. S3 Continuous flow synthesis of (+)-boldenone .....                                                                                                                    | 8  |
| Tab.S4 Continuous flow synthesis of (+)-boldenone undecylenate .....                                                                                                        | 9  |
| Tab. S5 NMR information of steroid compounds .....                                                                                                                          | 10 |
| Fig. S1 A Time course studies for <i>E. coli</i> -PmCR- and <i>E. coli</i> -17 $\beta$ -CR-catalyzed conversion of 4-AD to TS with different substrate concentrations ..... | 11 |
| Fig. S2 HPLC analysis of 4-AD, ADD, TS and BD equipped with chiral column.....                                                                                              | 12 |
| Fig. S3 Protein expression of the selected $\Delta^1$ -KstDs, carbonyl reductases.....                                                                                      | 13 |
| Fig. S4 Optimization of the reaction parameters of the developed biocatalytic cascade .....                                                                                 | 14 |
| Fig. S5 Protein expression and co-expression of ReM2 and 17 $\beta$ -CR. ....                                                                                               | 15 |
| Fig. S6 Reaction condition optimization for the enzymatic cascade synthesis of BD .....                                                                                     | 16 |
| Fig. S7 HPLC standard curve of 4-AD, ADD, TS and BD. ....                                                                                                                   | 18 |
| Fig. S8 HPLC analysis of 4-AD, ADD, TS and BD standards. ....                                                                                                               | 19 |
| Fig. S9 A plot of the reaction velocity as a function of the substrate concentration as described by the Michaelis-Menten equation. ....                                    | 20 |

**route I**

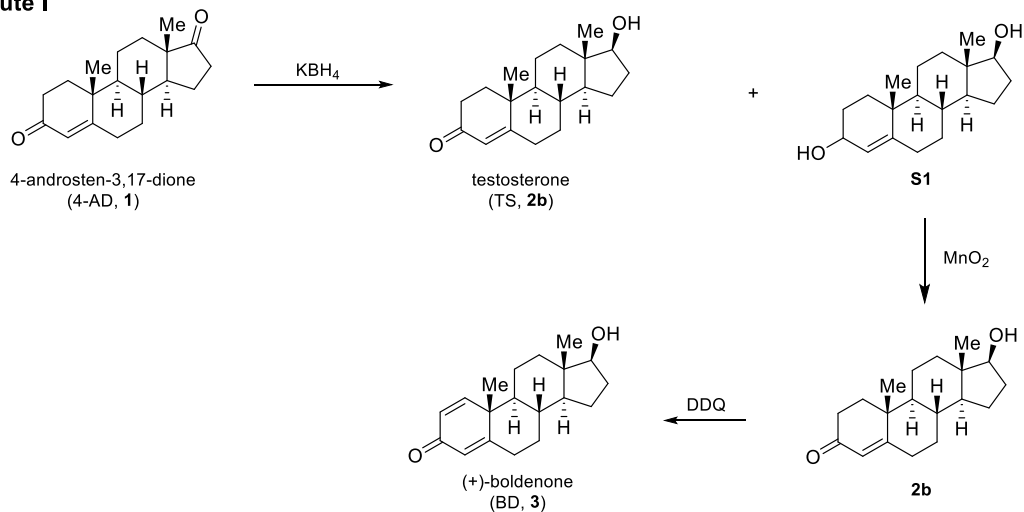

**route II**

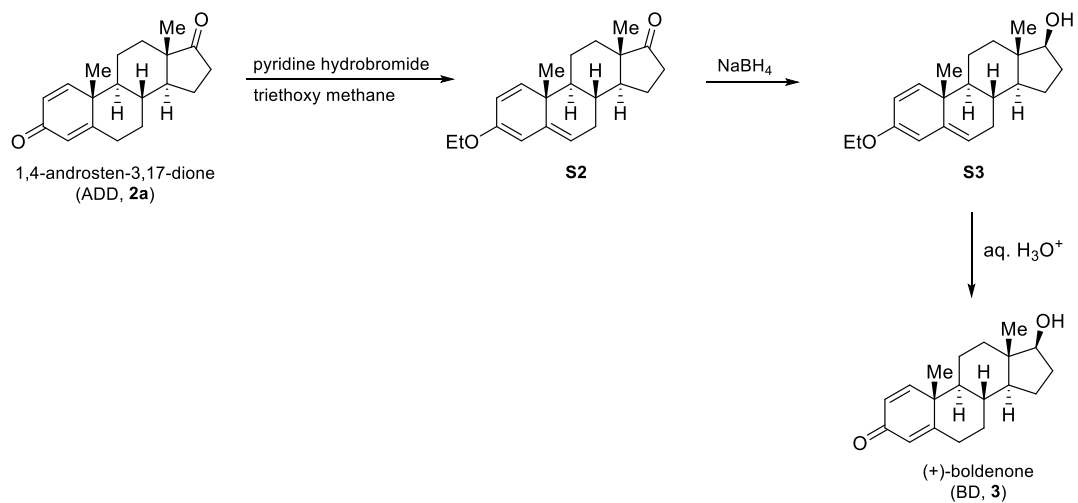

**Scheme S1. Chemical approaches for the synthesis of (+)-boldenone.**

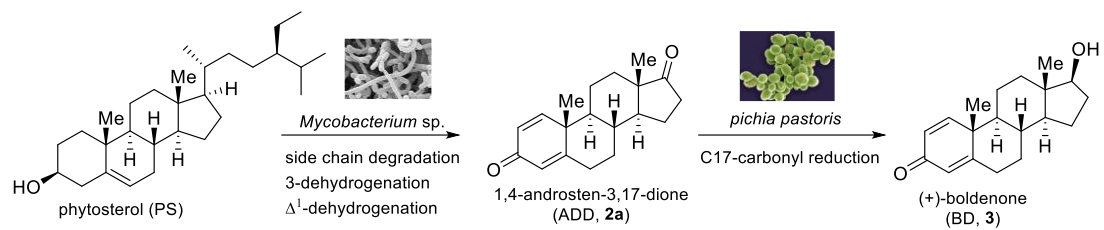

**Scheme S2** The stepwise transformations from PS to (+)-boldenone.

---

**Tab. S1 Primers for mutagenesis of ReKstD**

| Primer      | 5' to 3' Sequence                                |
|-------------|--------------------------------------------------|
| ReKstD-F    | CATATGCAGGATTGGACGAGTGAA ( <i>Nde</i> I)         |
| ReKstD-R    | AAGCTTTATTTAGCCATATCCTGA ( <i>Hind</i> III)      |
| G48/A49-F   | ACAAGTGCGTATAGCNDTNDT AGTATTTGGTTACCGGGCACACAGGT |
| G48/A49-R   | CGGTAACCAAATACTAHNAHNGCTATACGCACTTGACCGCCAAA     |
| S50/I51-F   | GCGTATAGCGGTGCGNDTNDT TGGTTACCGGGCACACAGGTT CAG  |
| S50/I51-R   | TGTGCCCGGTAACCAAHNAHNGCACCCTATACGCACTTGACCG      |
| P488-F      | AGGTTTTATCCAGGCNDTGGTGTCCGTTAGGTACAGCGATGGTG     |
| P488-R      | ACCTAACGGAACACCAHNGCCTGGATAAAACCTCCCGACAGTGA     |
| F114-F      | TTTGAATTCGTGCCNDTCCGGATTATTATAAAGCAGAAGGTCGC     |
| F114-R      | TTTATAATAATCCGGAHNGGCACGAAATTCAAATTCGATATTTGG    |
| L445-F      | ATTGTGCTGAGCGATNDTGGGACAAAAGGTGGTTTAGTGACCGAT    |
| L445-R      | ACCACCTTTGTCCC AHNATCGCTCAGCACAATGCGTGCAGCATA    |
| F416-F      | CCTTACGATGCCTTTNDTTGCCTCCTAATGGCGGTCTCTAATGC     |
| F416-R      | GCCATTAGGAGGACA AHNAAAGGCATCGTAAGGATCTTCACCGCG   |
| F292/V294-F | GATGGCTCTGCTGCCNDTATGNDTGGTGTTCGTGGTGGCTTAGTT    |
| F292/V294-R | GCCACCACGAACACCAHNCATAHNGGCAGCAGAGCCATCTGGCTG    |
| I350/I352-F | GGCGGCTTACCAGCCNDTTGTNDTCCAATACAGCTCCTGCCAAA     |
| I350/I352-R | AGGAGCTGTATTTGGAHNACA AHN GGCTGGTAAGCCGCCACCTTC  |
| I51G-F      | GCGAGTGGCTGGTTACCGGGCAC                          |
| I51G-R      | TAACCAGCCACTCGCACCCTAT                           |
| I51A-F      | GCGAGTGGCTGGTTACCGGGCAC                          |
| I51A-R      | TAACCACGC ACTCGCACCCTAT                          |
| I51L-F      | GCGAGTCTGTGGTTACCGGGCAC                          |
| I51L-R      | TAACCA CAGACTCGCACCCTAT                          |
| I51V-F      | GCGAGTGTTGGTTACCGGGCAC                           |
| I51V-R      | TAACCAAACTCGCACCCTAT                             |
| I51P-F      | GCGAGTCCATGGTTACCGGGCAC                          |
| I51P-R      | TAACCATGGACTCGCACCCTAT                           |
| I51F-F      | GCGAGTTTTGGTTACCGGGCAC                           |
| I51F-R      | TAACCAAAA ACTCGCACCCTAT                          |
| I51M-F      | GCGAGTATGTGGTTACCGGGCAC                          |
| I51M-R      | TAACCA CATACTCGCACCCTAT                          |
| I51W-F      | GCGAGTTGGTGGTTACCGGGCAC                          |
| I51W-R      | TAACCA CCACTCGCACCCTAT                           |
| I51S-F      | GCGAGTAGCTGGTTACCGGGCAC                          |
| I51S-R      | TAACCA GCTACTCGCACCCTAT                          |
| I51Q-F      | GCGAGTCAGTGGTTACCGGGCAC                          |
| I51Q-R      | TAACCA CTGACTCGCACCCTAT                          |
| I51T-F      | GCGAGTACCTGGTTACCGGGCAC                          |
| I51T-R      | TAACCA GGTACTCGCACCCTAT                          |
| I51C-F      | GCGAGTTGTTGGTTACCGGGCAC                          |
| I51C-R      | TAACCA ACACTCGCACCCTAT                           |
| I51N-F      | GCGAGTAATTGGTTACCGGGCAC                          |
| I51N-R      | TAACCA ATTACTCGCACCCTAT                          |
| I51Y-F      | GCGAGTTATTGGTTACCGGGCAC                          |
| I51Y-R      | TAACCA ATAACTCGCACCCTAT                          |
| I51D-F      | GCGAGTGATTGGTTACCGGGCAC                          |
| I51D-R      | TAACCA ATCACTCGCACCCTAT                          |
| I51E-F      | GCGAGTGAATGGTTACCGGGCAC                          |
| I51E-R      | TAACCA TTCACTCGCACCCTAT                          |
| I51K-F      | GCGAGTAAATGGTTACCGGGCAC                          |

|         |                                         |
|---------|-----------------------------------------|
| I51K-R  | TAACCA <b>TTT</b> ACTCGCACCGCTAT        |
| I51R-F  | GCGAGT <b>AGG</b> TGGTTACCGGGCAC        |
| I51R-R  | TAACCA <b>CCT</b> ACTCGCACCGCTAT        |
| I51H-F  | GCGAGT <b>CAT</b> TGGTTACCGGGCAC        |
| I51H-R  | TAACCA <b>ATG</b> ACTCGCACCGCTAT        |
| I350G-F | CCAGCC <b>GGC</b> TGTATCCCAAATACAGC     |
| I350G-R | GATACA <b>GCC</b> GGCTGGTAAGCCGCC       |
| I350A-F | CCAGCC <b>GCC</b> TGTATCCCAAATACAGC     |
| I350A-R | GATACA <b>GGC</b> GGCTGGTAAGCCGCC       |
| I350L-F | CCAGCC <b>GCG</b> TGTATCCCAAATACAGC     |
| I350L-R | GATACA <b>CGC</b> GGCTGGTAAGCCGCC       |
| I350V-F | CCAGCC <b>GTT</b> TGTATCCCAAATACAGC     |
| I350V-R | GATACA <b>AAC</b> GGCTGGTAAGCCGCC       |
| I350P-F | CCAGCC <b>CCG</b> TGTATCCCAAATACAGC     |
| I350P-R | GATACA <b>CGG</b> GGCTGGTAAGCCGCC       |
| I350F-F | CCAGCC <b>TTT</b> TGTATCCCAAATACAGC     |
| I350F-R | GATACA <b>AAA</b> GGCTGGTAAGCCGCC       |
| I350M-F | CCAGCC <b>ATG</b> TGTATCCCAAATACAGC     |
| I350M-R | GATACA <b>CAT</b> GGCTGGTAAGCCGCC       |
| I350W-F | CCAGCC <b>TGG</b> TGTATCCCAAATACAGC     |
| I350W-R | GATACA <b>CCA</b> GGCTGGTAAGCCGCC       |
| I350S-F | CCAGCC <b>AGC</b> TGTATCCCAAATACAGC     |
| I350S-R | GATACA <b>GCT</b> GGCTGGTAAGCCGCC       |
| I350Q-F | CCAGCC <b>CAG</b> TGTATCCCAAATACAGC     |
| I350Q-R | GATACA <b>CTG</b> GGCTGGTAAGCCGCC       |
| I350T-F | CCAGCC <b>ACC</b> TGTATCCCAAATACAGC     |
| I350T-R | GATACA <b>GGT</b> GGCTGGTAAGCCGCC       |
| I350C-F | CCAGCC <b>TGT</b> TGTATCCCAAATACAGC     |
| I350C-R | GATACA <b>ACA</b> GGCTGGTAAGCCGCC       |
| I350N-F | CCAGCC <b>AAT</b> TGTATCCCAAATACAGC     |
| I350N-R | GATACA <b>ATT</b> GGCTGGTAAGCCGCC       |
| I350Y-F | CCAGCC <b>TAT</b> TGTATCCCAAATACAGC     |
| I350Y-R | GATACA <b>ATG</b> GGCTGGTAAGCCGCC       |
| I350D-F | CCAGCC <b>GAT</b> TGTATCCCAAATACAGC     |
| I350D-R | GATACA <b>ATC</b> GGCTGGTAAGCCGCC       |
| I350E-F | CCAGCC <b>GAA</b> TGTATCCCAAATACAGC     |
| I350E-R | GATACA <b>TTG</b> GGCTGGTAAGCCGCC       |
| I350K-F | CCAGCC <b>AAAT</b> TGTATCCCAAATACAGC    |
| I350K-R | GATACA <b>TTT</b> GGCTGGTAAGCCGCC       |
| I350R-F | CCAGCC <b>AGG</b> TGTATCCCAAATACAGC     |
| I350R-R | GATACA <b>CCT</b> GGCTGGTAAGCCGCC       |
| I350H-F | CCAGCC <b>CAT</b> TGTATCC<br>CAAATACAGC |
| I350H-R | GATACA <b>ATG</b> GGCTGGTAAGCCGCC       |

\*The sequences in this table were designed based on wild type ReKstD. The primer sequence was adjusted when the template is variant.

---

**Tab. S2 Construction of each *E. coli* cells based on different plasmid compositions.**

| Entry | <i>E. coli</i> strains    | Plasmids <sup>a</sup>                                                             | Entry | <i>E. coli</i> strains         | Plasmids <sup>a</sup>                                                               |
|-------|---------------------------|-----------------------------------------------------------------------------------|-------|--------------------------------|-------------------------------------------------------------------------------------|
| 1     | <i>E. coli</i> (Re-21a)   |  | 7     | <i>E. coli</i> (ReM2)          |  |
| 2     | <i>E. coli</i> (Re-RSF)   |  | 8     | <i>E. coli</i> (Re-21a+CR-RSF) |  |
| 3     | <i>E. coli</i> (CR-30a)   |  | 9     | <i>E. coli</i> (Re-RSF+CR-30a) |  |
| 4     | <i>E. coli</i> (CR-RSF)   |  | 10    | <i>E. coli</i> (RSF-ReM2_CR)   |  |
| 5     | <i>E. coli</i> (Re-IS11L) |  | 11    | <i>E. coli</i> (RSF-CR_ReM2)   |  |
| 6     | <i>E. coli</i> (Re-I350T) |  |       |                                |                                                                                     |

<sup>a</sup> RSF: pRSFDuet-1; arrow: T7 promoter; "+": Different but compatible plasmids; underline: Tandem arrangement of different genes.

**Tab. S3 Continuous flow synthesis of (+)-boldenone (3) through biocatalytic  $\Delta^1$ -dehydrogenation and C17 $\beta$ -carbonyl reduction cascade in a PTFE coil reactor.**

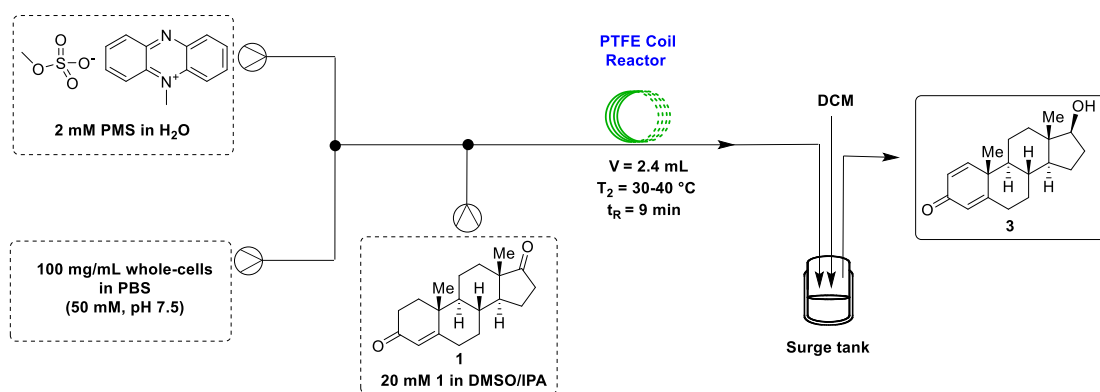

| Entry | Temp. (°C) | DMSO (% v/v) | t <sub>R</sub> (min) | Yield (%) <sup>a</sup> |
|-------|------------|--------------|----------------------|------------------------|
| 1     | 30         | 30           | 9                    | 79.7                   |
| 2     | 30         | 40           | 9                    | 99.2                   |
| 3     | 30         | 50           | 9                    | 70.7                   |
| 4     | 40         | 40           | 9                    | 45.4                   |

<sup>a</sup>Yield was determined by LC-MS.



**Tab.S4 Continuous flow synthesis of (+)-boldenone undecylenate (4) starting from purified (+)-boldenone.**

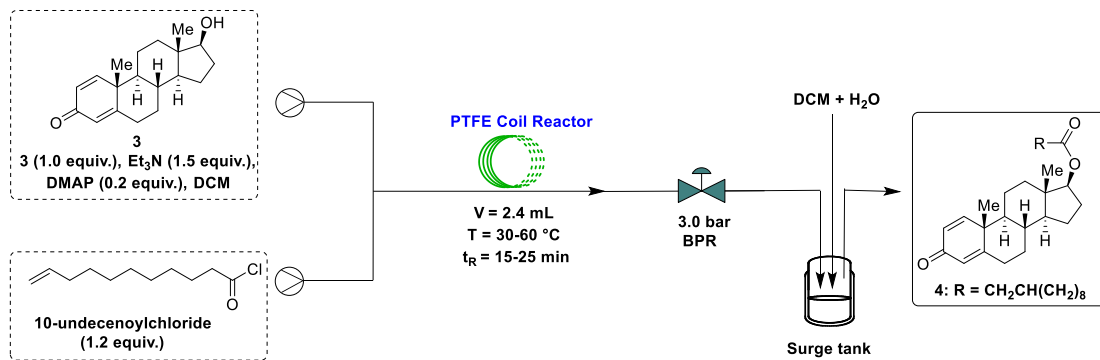

| Entry | Temp. (°C) | t <sub>R</sub> (min) | Yield (%) <sup>a</sup> | Entry | Temp. (°C) | t <sub>R</sub> (min) | Yield (%) <sup>a</sup> |
|-------|------------|----------------------|------------------------|-------|------------|----------------------|------------------------|
| 1     | 30         | 20                   | 87.6                   | 5     | 60         | 10                   | 61.3                   |
| 2     | 40         | 20                   | 92.6                   | 6     | 60         | 15                   | 68.2                   |
| 3     | 50         | 20                   | 92.1                   | 7     | 60         | 25                   | 98.9                   |
| 4     | 60         | 20                   | 93.9                   |       |            |                      |                        |

<sup>a</sup>Yield was determined by LC-MS.

**Tab. S5 NMR information of steroid compounds**

| Compounds                               | <sup>1</sup> H NMR                                                                                                                                                                                                                                                                                                                                                                                                                                                                                                                                                                                                                                                                                                                    |
|-----------------------------------------|---------------------------------------------------------------------------------------------------------------------------------------------------------------------------------------------------------------------------------------------------------------------------------------------------------------------------------------------------------------------------------------------------------------------------------------------------------------------------------------------------------------------------------------------------------------------------------------------------------------------------------------------------------------------------------------------------------------------------------------|
| (+)-Boldenone ( <b>3</b> )              | (500 MHz, Chloroform- <i>d</i> ) $\delta$ = 7.03 (d, <i>J</i> = 10.2 Hz, 1H), 6.19 (dd, <i>J</i> = 10.2, 2.0 Hz, 1H), 6.03 (d, <i>J</i> = 1.8 Hz, 1H), 3.60 (t, <i>J</i> = 8.5 Hz, 1H), 2.43 (tdd, <i>J</i> = 13.5, 5.2, 1.6 Hz, 1H), 2.32 (ddd, <i>J</i> = 13.3, 4.5, 2.6 Hz, 1H), 2.12-1.97 (m, 2H), 1.96-1.88 (m, 1H), 1.88-1.80 (m, 1H), 1.77-1.69 (m, 1H), 1.69-1.52 (m, 3H), 1.44 (dddd, <i>J</i> = 13.5, 11.7, 8.1, 3.4 Hz, 1H), 1.29 (qd, <i>J</i> = 12.1, 5.7 Hz, 1H), 1.20 (s, 3H), 1.09-0.95 (m, 3H), 0.91 (ddd, <i>J</i> = 12.2, 10.7, 7.1 Hz, 1H), 0.78 (s, 3H).                                                                                                                                                         |
| (+)-boldenone undecylenate ( <b>4</b> ) | (500 MHz, Chloroform- <i>d</i> ) $\delta$ = 7.04 (d, <i>J</i> = 10.2 Hz, 1H), 6.22 (dd, <i>J</i> = 10.1, 1.9 Hz, 1H), 6.06 (t, <i>J</i> = 1.7 Hz, 1H), 5.79 (ddt, <i>J</i> = 16.9, 10.2, 6.7 Hz, 1H), 5.02-4.88 (m, 2H), 4.58 (dd, <i>J</i> = 9.2, 7.8 Hz, 1H), 2.46 (tdd, <i>J</i> = 13.5, 5.1, 1.6 Hz, 1H), 2.36 (ddd, <i>J</i> = 13.3, 4.4, 2.5 Hz, 1H), 2.28 (t, <i>J</i> = 7.5 Hz, 2H), 2.16 (dtd, <i>J</i> = 13.6, 9.4, 6.2 Hz, 1H), 2.02 (tdd, <i>J</i> = 6.6, 5.3, 1.4 Hz, 2H), 1.97-1.91 (m, 1H), 1.80-1.69 (m, 2H), 1.69-1.56 (m, 4H), 1.53-1.44 (m, 1H), 1.37 (dt, <i>J</i> = 12.2, 9.3 Hz, 3H), 1.28 (hepta, <i>J</i> = 5.0, 4.1 Hz, 9H), 1.25-1.15 (m, 4H), 1.04 (tdd, <i>J</i> = 12.4, 10.4, 5.7 Hz, 3H), 0.85 (s, 3H). |

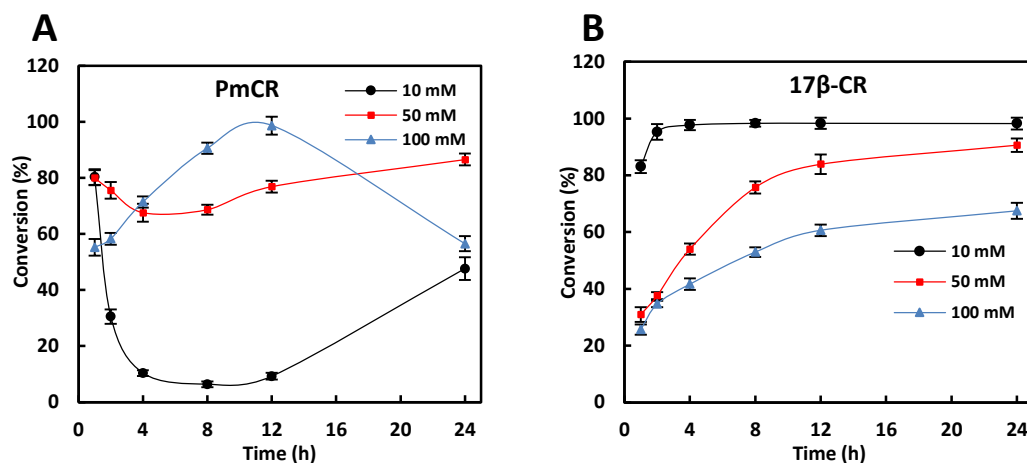

**Fig. S1 A Time course for *E. coli*-PmCR catalyzed conversion of 1 to 2b with different substrate concentrations.**

Reaction conditions: the reaction mixtures performed with substrate 1 (10, 50 and 100 mM), 100 mg/mL expressed *E. coli*-PmCR wet cells, 20 mg/mL lytic cells expressing *Bst*FDH, 10.2 mg/mL sodium formate, 0.3 mM NADP<sup>+</sup>, 4% (v/v) Tween 80, PBS (50 mM, pH 7.5) until the total system was 1 mL, 37 °C, 200 rpm for 0-24 h. **B Time course for**

***E. coli*-17β-CR catalyzed conversion of 1 to 2b with different substrate concentrations.** Reaction conditions: the reaction mixtures performed with 10% (v/v) IPA, substrate 1 (10, 50 and 100 mM), 100 mg/mL expressed *E. coli*-17β-CR wet cells, PBS (50 mM, pH 7.5) until the total system was 1 mL, 37 °C, 200 rpm for 0-24 h.

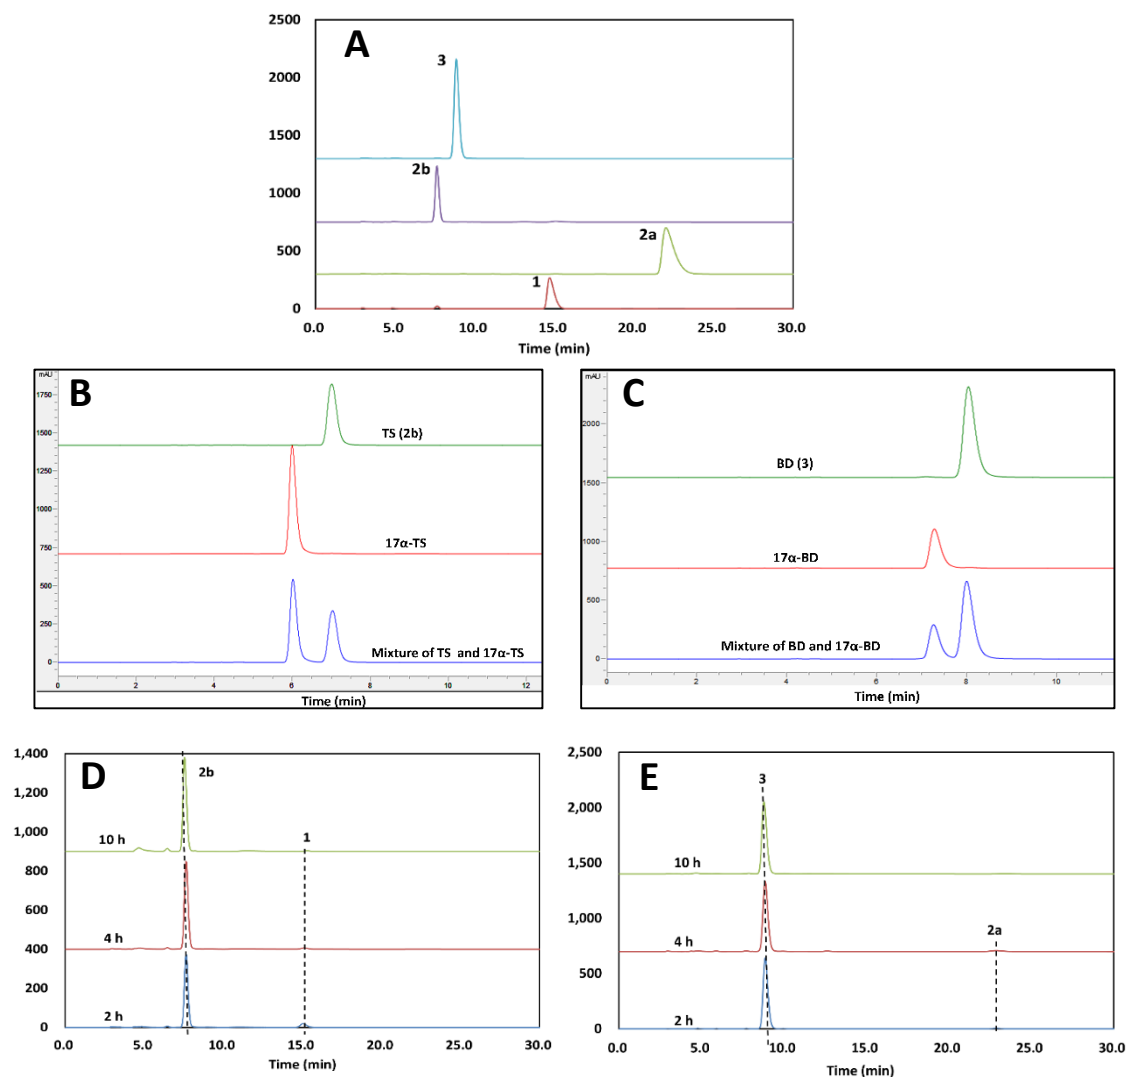

**Fig. S2** HPLC analysis of 4-AD (**1**), ADD (**2a**), TS (**2b**), and BD (**3**) equipped with chiral OD-H column. **A**, **B** and **C** The standard samples were dissolved in isopropanol, and used for diastereomeric excess (*de*) determination with high-performance liquid chromatography (HPLC) equipped with a Chiralcel OD-H column. HPLC was performed at 254 nm and 30 °C, hexane/isopropanol (80:20, v/v) as the mobile phase at a flow rate of 1.0 mL/min. The retention times of 4-AD, ADD, TS, 17 $\alpha$ -testosterone (17 $\alpha$ -TS), BD and 17 $\alpha$ -boldenone (17 $\alpha$ -BD) were 14.70, 22.01, 7.63, 6.23, 8.84 and 7.21 min, respectively. **D** Time course for *E. coli* (17 $\beta$ -CR)-catalyzed conversion of **1** to **2b**. **E** Time course for *E. coli* (17 $\beta$ -CR)-catalyzed conversion of **2a** to **3**. Reaction conditions: 25 mM **1** or **2a**, 50 mg wet cells expressing 17 $\beta$ -CR, 10% (v/v) IPA, PBS (50 mM, pH 7.5), 30 °C, 200 rpm, 2, 4 and 10 h, respectively. The reaction mixtures were extracted with ethyl acetate, evaporated under vacuum, dried over anhydrous Na<sub>2</sub>SO<sub>4</sub>, and used for diastereomeric excess value (*de* value) determination with the test method of standards.

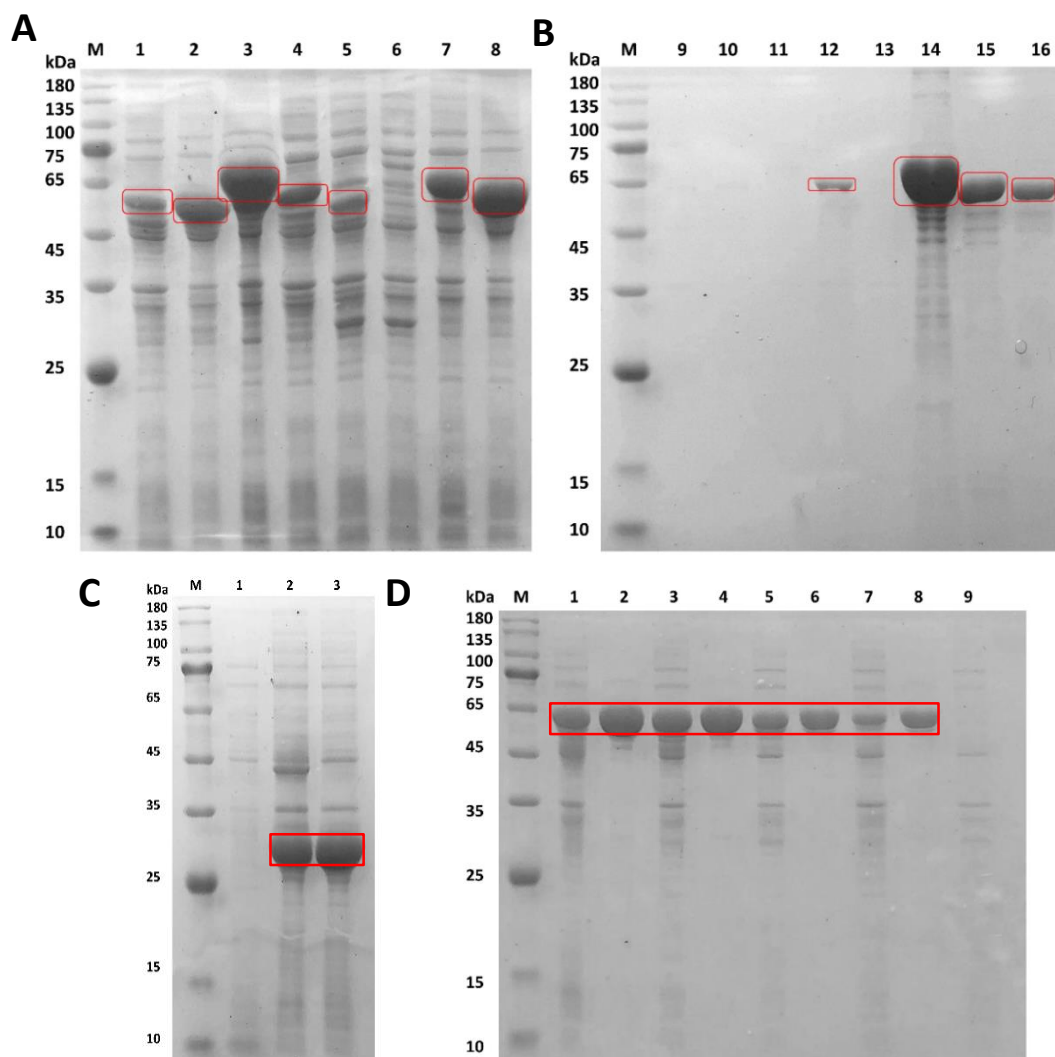

**Fig. S3 A, B Protein expression of the selected  $\Delta^1$ -KstDs.** After ultrasonic crushing centrifugal, SDS-PAGE analysis of different  $\Delta^1$ -KstDs in supernatant. SDS-PAGE analysis of different  $\Delta^1$ -KstDs in precipitation. Lane **M**, molecular weight standards; lane **1** and **9**, *E. coli*-MsKstD1 supernatant and precipitation; lane **2** and **10**, *E. coli*-ReKstD supernatant and precipitation; lane **3** and **11**, *E. coli*-RgKstD supernatant and precipitation; lane **4** and **12**, *E. coli*-NockKstD supernatant and precipitation; lane **5** and **13**, *E. coli*-SQ1KstD supernatant and precipitation; lane **6** and **14**, *E. coli*-LnKstD supernatant and precipitation; lane **7** and **15**, *E. coli*-MtKstD supernatant and precipitation; lane **8** and **16**, *E. coli*-MrKstD supernatant and precipitation. SDS-PAGE analysis illustrated that most of protein mainly existed in the supernatant, indicating a soluble expression, with an exception, LnKstD protein was expressed in form of inclusion bodies (IB) entirely with no activity.

**C Protein expression of the selected carbonyl reductases.** Lane **M**, molecular weight standards; lane **1**, *E. coli*-pET-30a; lane **2**, *E. coli*-PmCR; lane **3**, *E. coli*-17 $\beta$ -CR.

**D Protein expression and purification of ReKstD and its variants.** SDS-PAGE analysis of the supernatant of the lysates and the purified proteins. Lane **M**, molecular weight standards; Lane **1, 3, 5, 7** and **9** are respectively the supernatants of the *E. coli* strains expressing ReKstD, Re-I51L, Re-I350T, ReM2 and empty vector pET-21a; Lane **2, 4, 6** and **8** are respectively the purified protein of ReKstD, Re-I51L, Re-I350T and ReM2.

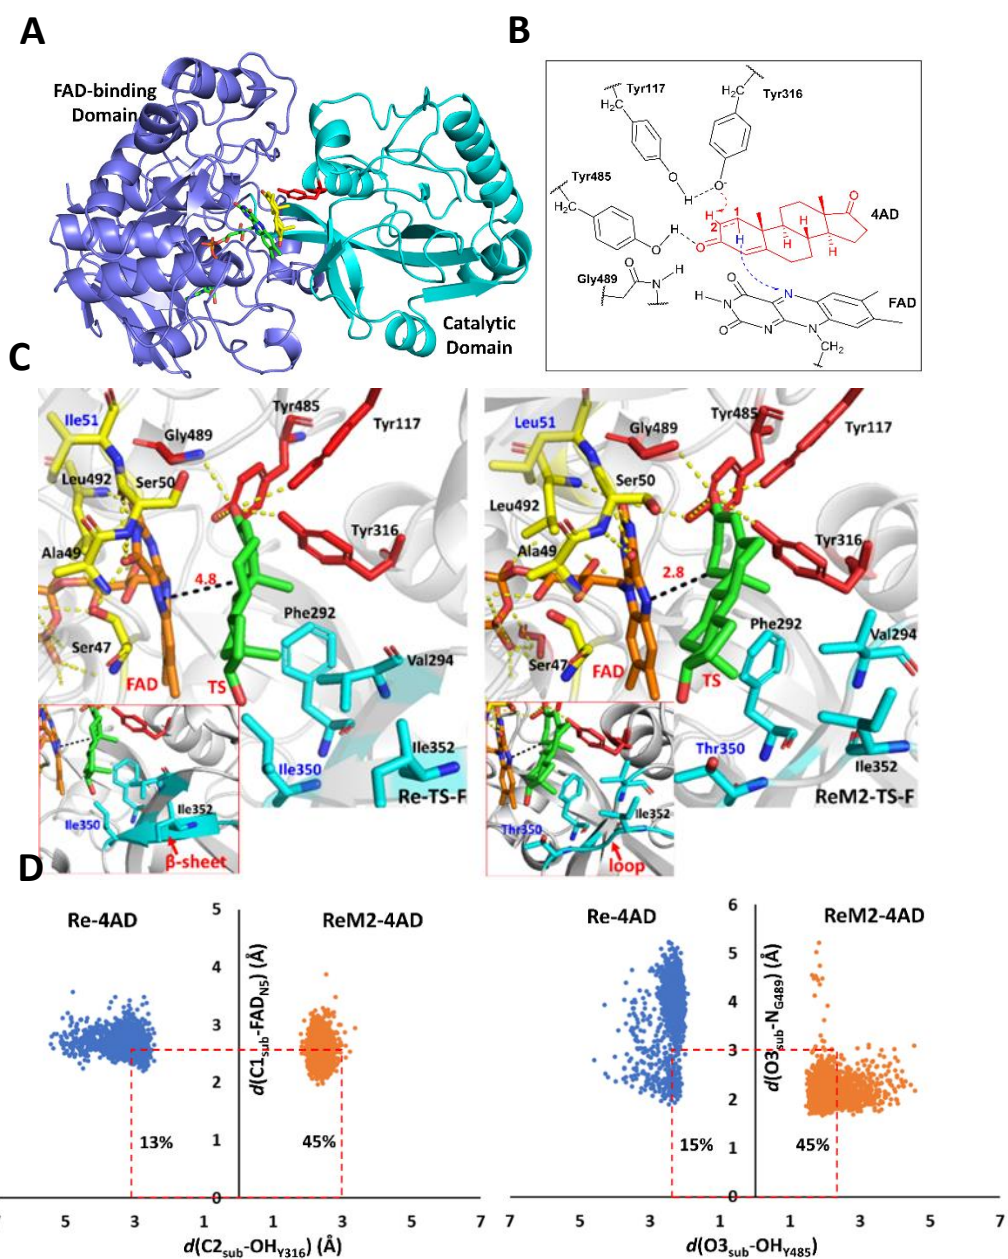

**Fig. S4** **A** Ribbon diagram of ReKstD assembled with FAD and 4-AD. Green, yellow, and red sticks were FAD, 4-AD, and Tyr316, respectively, and FAD-binding domain was slate blue, the catalytic domain was in cyan. **B** Reaction scheme of  $\Delta^1$ -dehydrogenation of 4-AD. The substrate is marked in red, and dashed lines represent hydrogen bond interactions. The first step corresponds to the abstraction of the  $2\beta$  proton at the C2 position of 3-ketosteroid by tyrosine anion Tyr316 and the second step is the  $1\alpha$  hydride transfer from the C1 position of the 3-ketosteroid to the N5 of the FAD. **C** Comparison of binding modes and hydrogen bonding of Re-TS and ReM2-TS in free-state simulation. The amino acid residues are shown in sticks, the four key residues which involved in  $\Delta^1$ -dehydrogenation reaction are shown red sticks. TS and FAD are depicted with green and orange carbon atoms, respectively. Hydrogen bonds are shown in yellow dashed lines, and the distances are shown with black dashes and value ( $\text{\AA}$ ). **D** Conformation maps of Re-4AD (blue) and ReM2-4AD (orange). The limits of “catalytic distances” colored by red dashes were  $d(\text{OH}_{\text{Y316}}-\text{C2}_{\text{sub}}) \leq 3.0 \text{ \AA}$ ,  $d(\text{N5}_{\text{FAD}}-\text{C1}_{\text{sub}}) \leq 2.6 \text{ \AA}$ ,  $d(\text{O3}_{\text{sub}}-\text{OH}_{\text{Y485}}) \leq 2.4 \text{ \AA}$ , and  $d(\text{O3}_{\text{sub}}-\text{N}_{\text{G489}}) \leq 3.0 \text{ \AA}$ .

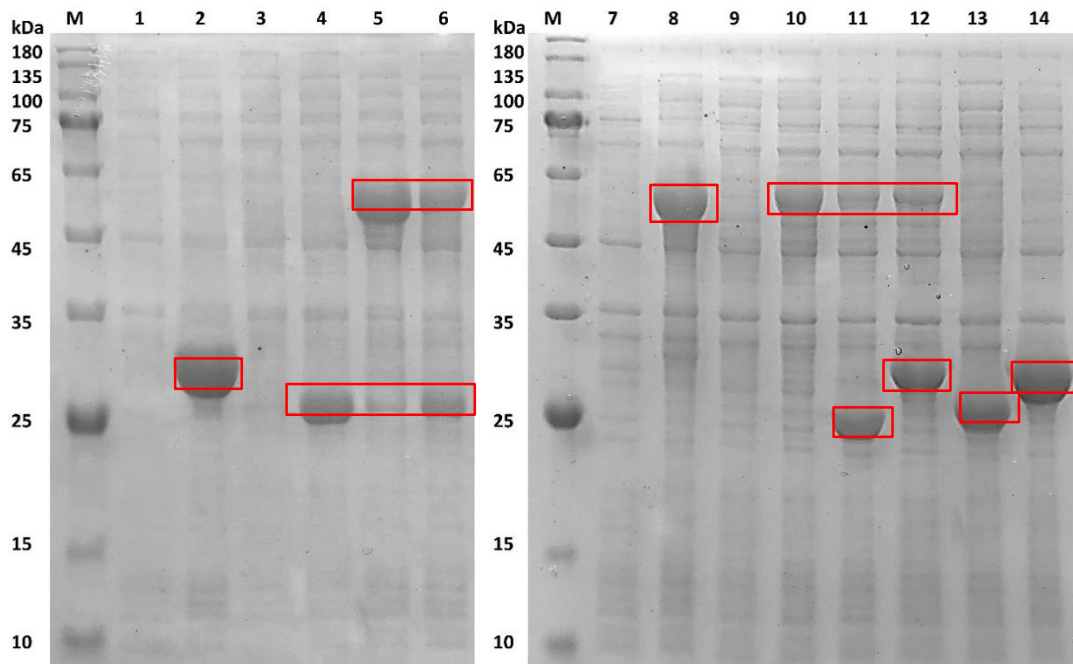

**Fig. S5 Protein expression and co-expression of ReM2 and 17 $\beta$ -CR.** After ultrasonic crushing centrifugal, SDS-PAGE analysis of different samples in supernatant. Lane **M**, molecular weight standards; lane **1**, *E. coli*-pET-30a; lane **2**, *E. coli*-pET-30a-17 $\beta$ -CR; lane **3**, *E. coli*-pRSFDuet-1; lane **4**, *E. coli*-pRSFDuet-1-17 $\beta$ -CR; lane **5**, *E. coli* (pRSFDuet-1-17 $\beta$ -CR+pET-21a-ReM2); lane **6**, *E. coli*-pRSFDuet-1-17 $\beta$ -CR-ReM2; lane **7**, *E. coli*-pET-21a; lane **8**, *E. coli*-pET-21a-ReM2; lane **9**, *E. coli*-pRSFDuet-1; lane **10**, *E. coli*-pRSFDuet-1-ReM2; lane **11**, *E. coli*-pRSFDuet-1-ReM2-17 $\beta$ -CR; lane **12**, *E. coli* (pRSFDuet-1-ReM2+ pET-30a-17 $\beta$ -CR); lane **13**, *E. coli*-pRSFDuet-1-17 $\beta$ -CR; lane **14**, *E. coli*-pET-30a-17 $\beta$ -CR.

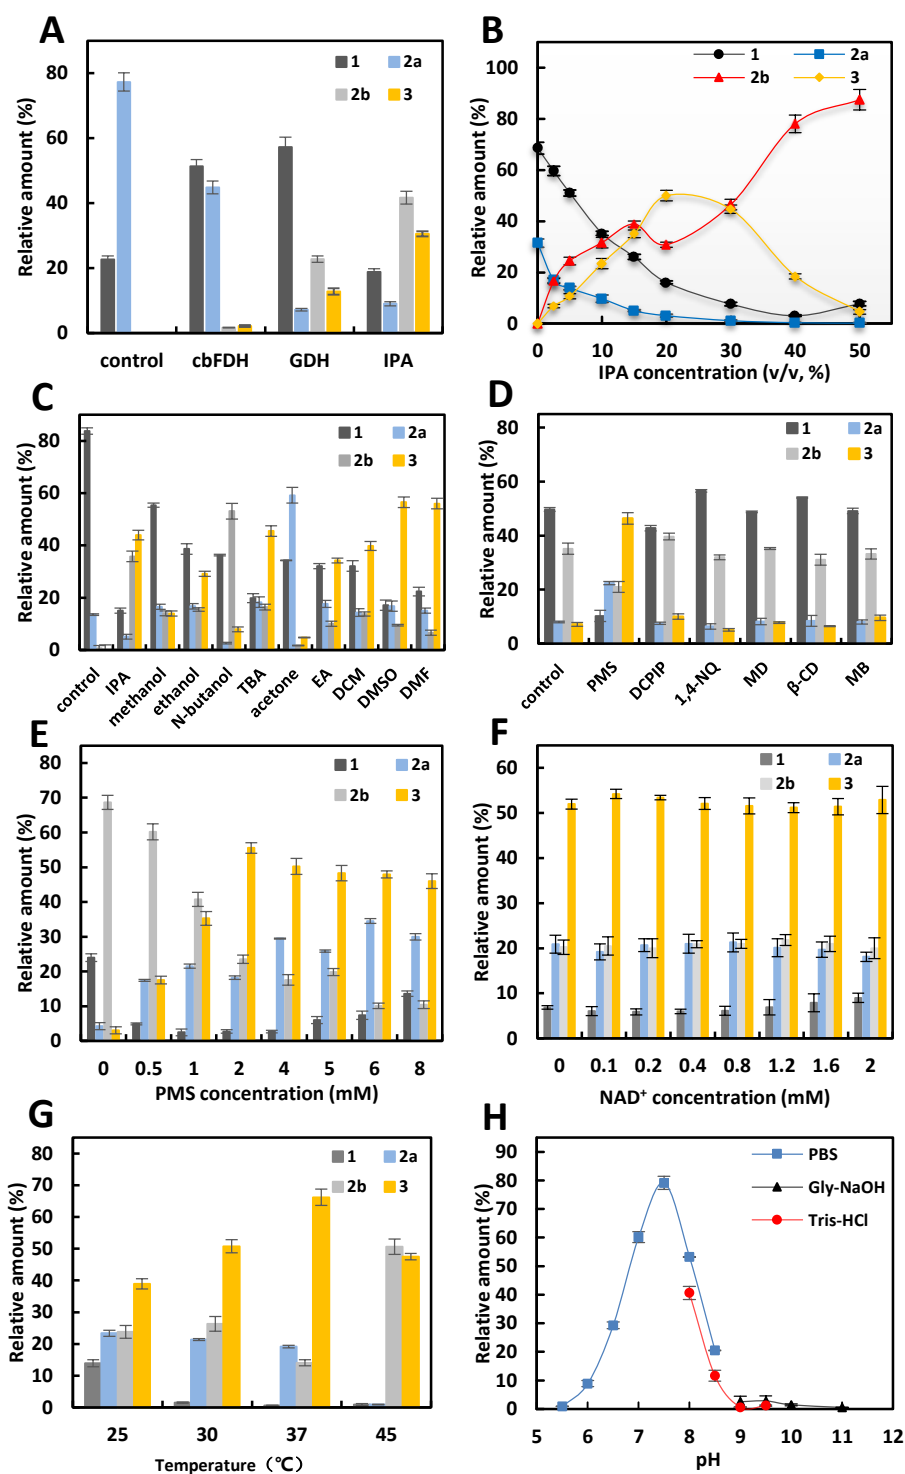

**Fig. S6 Reaction condition optimization for the enzymatic cascade synthesis of 3. A** Cofactor regeneration system.

Reaction conditions (1 mL): the reaction mixtures performed with 4-AD (20 mM), 100 mg/mL co-expressed *E. coli* wet cells, 1 mM PMS, 10% (v/v) DMSO, PBS (50 mM, pH 7.5), 30  $^{\circ}\text{C}$ , 200 rpm for 2 h. I: 35 mM sodium formate, and 0.2 mM  $\text{NAD}^+$ , 50  $\mu\text{L}$  *cbFDH* (100 mg/mL wet cells) for *cbFDH* regeneration system; II: 35 mM glucose, and 0.2 mM  $\text{NAD}^+$ , 50  $\mu\text{L}$  *BtGDH* (100 mg/mL wet cells) for *GDH* regeneration system; III: 0.2 mM  $\text{NAD}^+$ , 10% (v/v) IPA for IPA regeneration system,). **B** IPA concentration. The reaction mixtures (1 mL) performed with 0-50% (v/v) IPA, 20 mM 4-AD, 100 mg/mL co-expressed *E. coli* wet cells, 1 mM PMS, and PBS (50 mM, pH 7.5) at 30  $^{\circ}\text{C}$ , 200 rpm for 2 h. **C**



Cosolvents. The reaction mixtures (1 mL) contained 0.5% (v/v) IPA, 20% (v/v) cosolvents, 20 mM 4-AD, 100 g/L co-expressed *E. coli* wet cells, 1 mM PMS, and PBS (50 mM, pH 7.5) at 30 °C, 200 rpm for 2 h. **D** Electron acceptors. The reaction mixtures (1 mL) performed with 0.5% (v/v) IPA, 20% (v/v) DMSO, 20 mM 4-AD, 100 g/L co-expressed *E. coli* wet cells, 6 mM electron acceptor, and PBS (50 mM, pH 7.5) at 30 °C, 200 rpm for 2 h. **E** PMS concentration. The reaction mixtures (1 mL) performed with 0.5% (v/v) IPA, 20% (v/v) DMSO, 20 mM 4-AD, 100 g/L co-expressed *E. coli* wet cells, 0-8 mM PMS, and PBS (50 mM, pH 7.5) at 30 °C, 200 rpm for 2 h. **F** NAD<sup>+</sup> concentration. The reaction mixtures (1 mL) performed with 0.5% (v/v) IPA, 20% (v/v) DMSO, 20 mM 4-AD, 100 g/L co-expressed *E. coli* wet cells, 2 mM PMS, and PBS (50 mM, pH 7.5) at 30 °C, 200 rpm for 2 h. **G** Temperature effect. The reaction mixtures (1 mL) performed with 0.5% (v/v) IPA, 20% (v/v) DMSO, 20 mM 4-AD, 100 g/L co-expressed *E. coli* wet cells, 2 mM PMS, and PBS (50 mM, pH 7.5) at 25-45 °C, 200 rpm for 2 h. **H** pH effect. The reaction mixtures (1 mL) performed with 0.5% (v/v) IPA, 20% (v/v) DMSO, 20 mM 4-AD, 100 g/L co-expressed *E. coli* wet cells, 2 mM PMS, and 50 mM PBS pH 5.5-8.5, 50 mM Gly-NaOH buffer pH 8.0-9.5, 50 mM Tris-HCl buffer pH 9.0-11.0, at 37 °C, 200 rpm for 2 h.

---

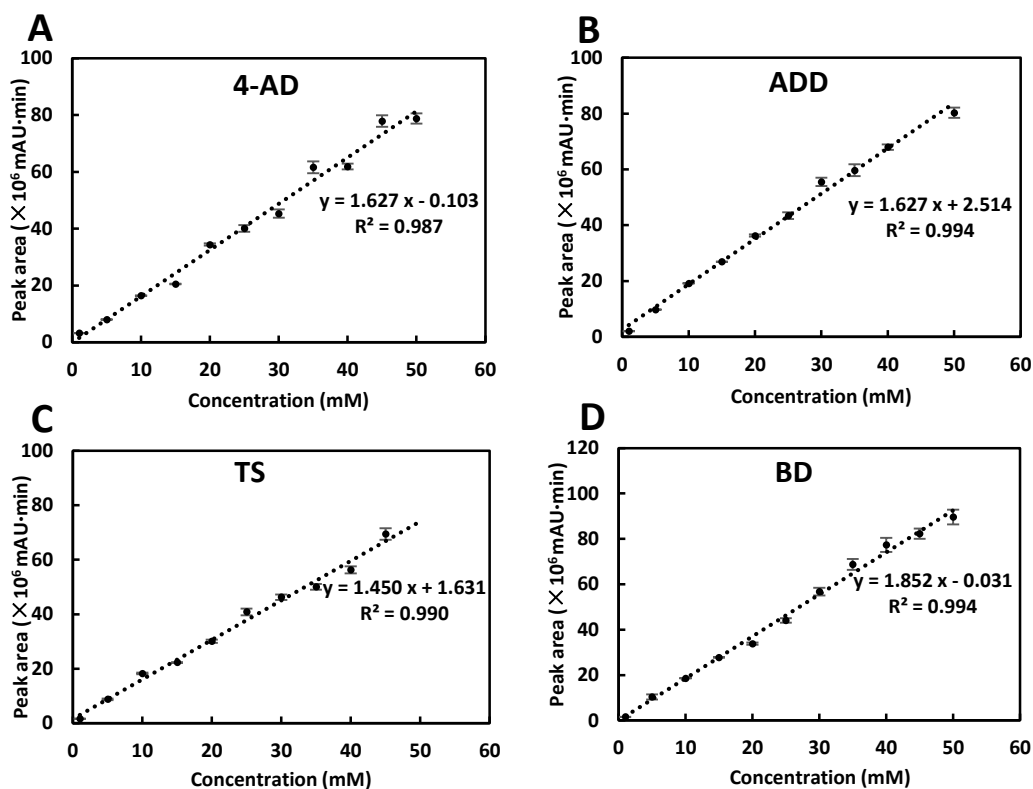

**Fig. S7 HPLC standard curve of 4-AD (A), ADD (B), TS (C) and BD (D).** The sample was dissolved in isopropanol alcohol (IPA), and was analyzed by high-performance liquid chromatography (HPLC) equipped with C18 column (SHIMADZU Shimpack, 5  $\mu$ m particles, 150 mm  $\times$  4.6 mm), and 35% acetonitrile and 65% water (v/v) as the mobile phase at a flow rate of 0.8 mL/min. The column oven temperature was set as 35  $^{\circ}$ C. The UV absorbance was determined at 254 nm. The retention time of 4-AD, ADD, TS and BD were 28.95 min, 18.56 min, 20.72 min and 13.65 min, respectively.

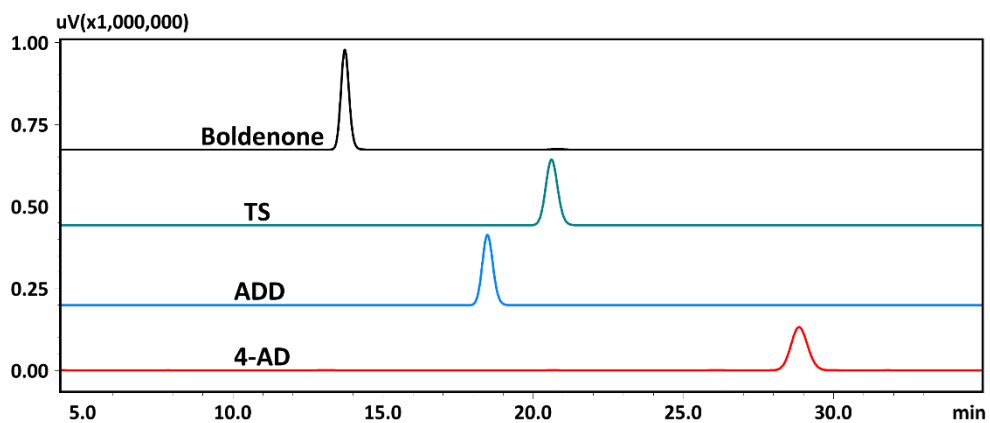

**Fig. S8 HPLC analysis of 4-AD, ADD, TS and BD standards.** The sample was dissolved in isopropanol alcohol (IPA), and was analyzed by high-performance liquid chromatography (HPLC) equipped with C18 column (SHIMADZU Shimpack, 5  $\mu$ m particles, 150 mm  $\times$  4.6 mm), and 35% acetonitrile and 65% water (v/v) as the mobile phase at a flow rate of 0.8 mL/min. The column oven temperature was set as 35  $^{\circ}$ C. The UV absorbance was determined at 254 nm. The retention time of 4-AD, ADD, TS and BD were 28.95 min, 18.56 min, 20.72 min and 13.65 min, respectively.

---

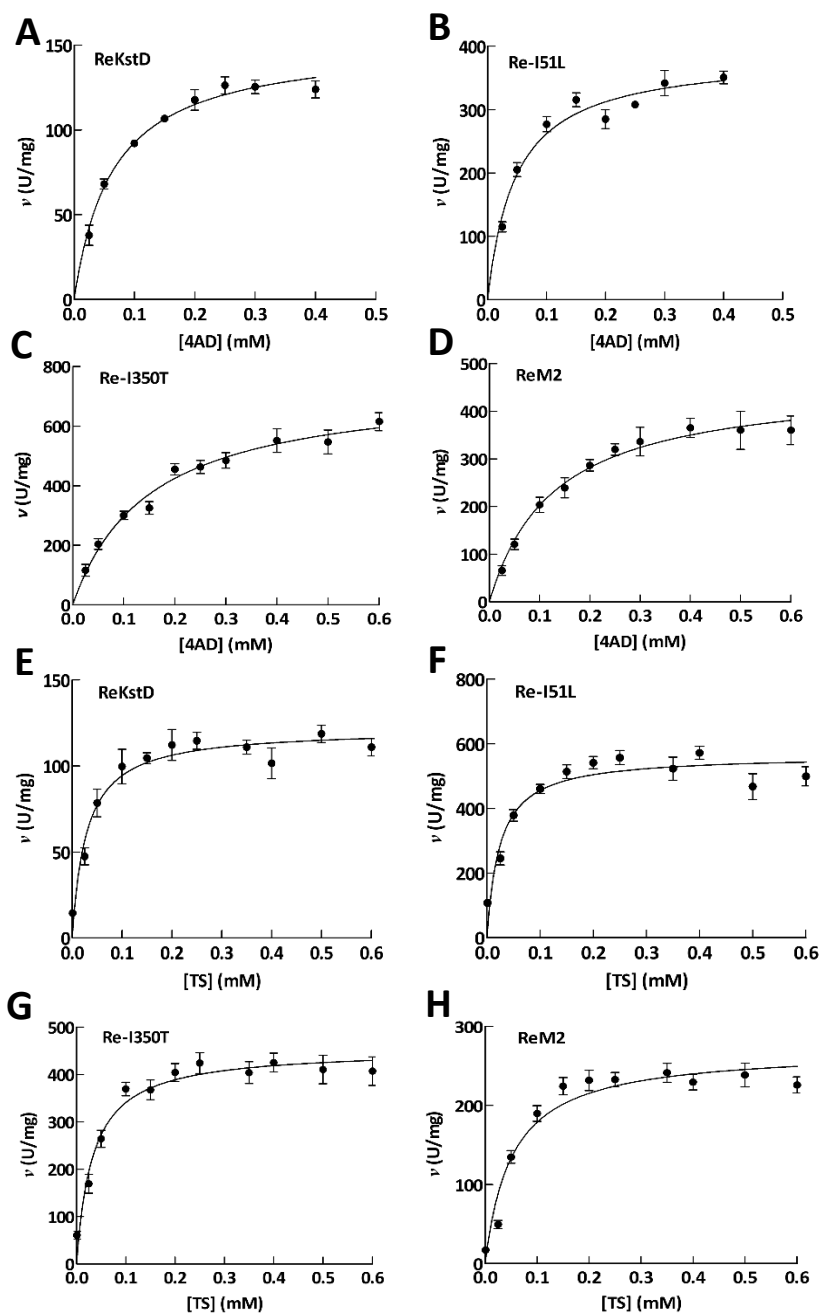

**Fig. S9 A plot of the reaction velocity as a function of the substrate concentration as described by the Michaelis-Menten equation. A-D,** the reaction velocity toward various concentration of 4-AD catalyzed by ReKstD, Re-I51L, Re-I350T, and ReM2, respectively. **E-H,** the reaction velocity toward various concentration of TS catalyzed by ReKstD, Re-I51L, Re-I350T, and ReM2, respectively. The rate of reaction was experimentally measured at several steroid substrate concentration values (4-AD: 0.025-0.60 mM; TS: 0.025-0.60 mM).  $V_{max}$  is the maximum reaction rate that is observed at saturating substrate concentrations,  $K_m$  is referred to as the Michaelis constant and is the substrate concentration at which the reaction rate is exactly half of  $V_{max}$ . Reaction conditions: The reaction mixtures (200  $\mu$ L) contained 1.5 mM PMS, 40  $\mu$ M DCPIP, 20  $\mu$ L of purified enzyme with an appropriate concentration, and 0-600  $\mu$ M steroidal substrate (20  $\mu$ L solution in DMSO) in Tris-HCl buffer (50 mM, pH 8.0). The reaction rates were determined by measuring the absorption of DCPIP at 600 nm ( $\epsilon_{600nm} = 18.7 \times 10^3$  /cm/M) with microplate reader at 30  $^{\circ}$ C. One unit of enzyme activity (U) is defined as the reduction of 1  $\mu$ mol DCPIP per minute.
